# Supplementary material for: An electrochemical sensing platform to determine tetrahydrozoline HCl in pure form, pharmaceutical formulation, and rabbit aqueous humor
Source: Royal Society of Chemistry journal article supplement (doi:10.1039/d0ay00882f), 2020-01-01
Supplement: d0ay00882f1.pdf [file d0ay00882f1.pdf]

Figure S1: Diagram representing sensors VII and XI-XIII
