# Supplementary material for: An electrochemical sensing platform to determine tetrahydrozoline HCl in pure form, pharmaceutical formulation, and rabbit aqueous humor
Source: Royal Society of Chemistry journal article supplement (doi:10.1039/d0ay00882f), 2020-01-01
Supplement: d0ay00882f3.pdf [file d0ay00882f3.pdf]

**Sensor VII**  
**Conventional liquid**  
**contact ISE**

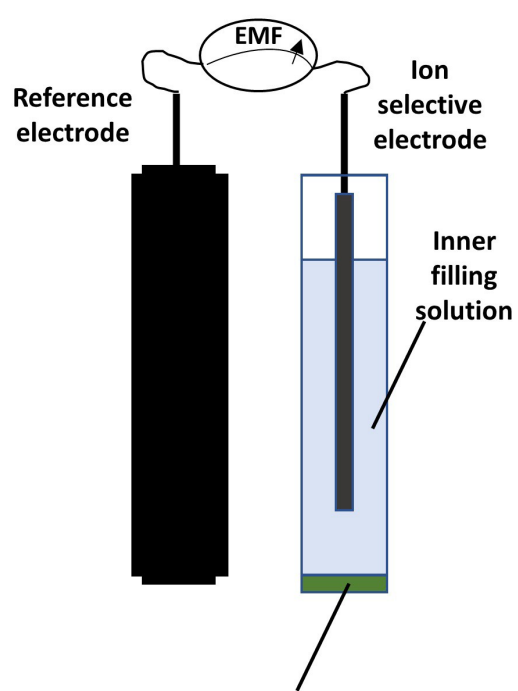

Ion selective  
membrane  
(PVC/O-NPOE/CX6)

**Sensor XI**  
**Cu-microfabricated**  
**electrode + ISM**

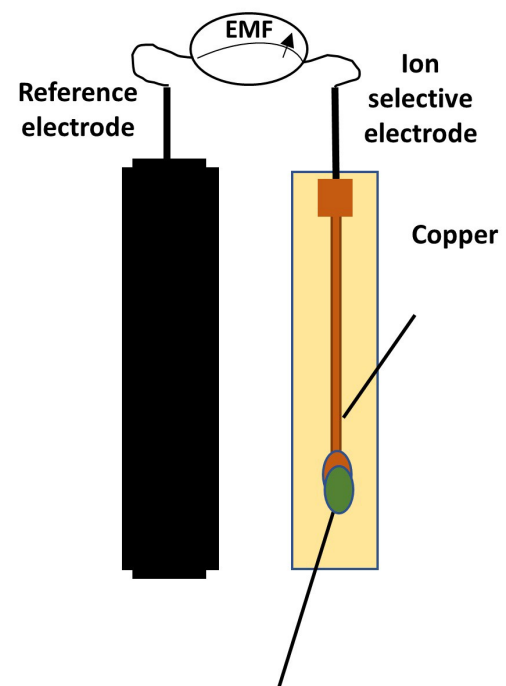

Drop of Ion selective  
membrane  
(PVC/O-NPOE/CX6)

**Sensor XII**  
**Carbon Screen printed**  
**electrode + ISM**

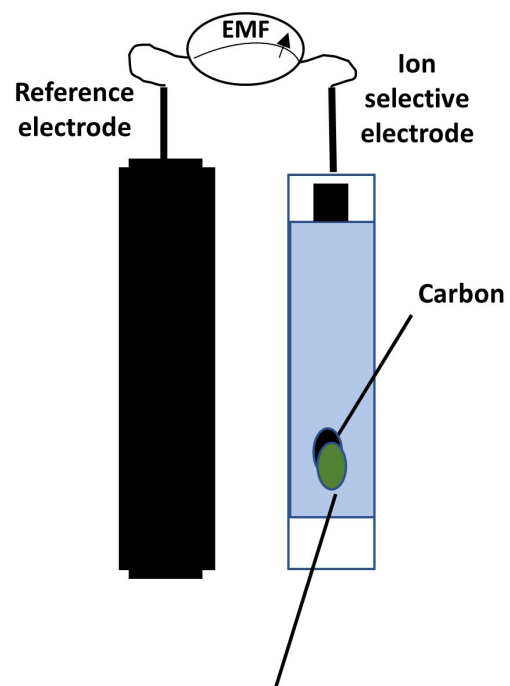

Drop of Ion selective  
membrane  
(PVC/O-NPOE/CX6)

**Sensor XIII**  
**Carbon Screen printed**  
**electrode + MWCNT + ISM**

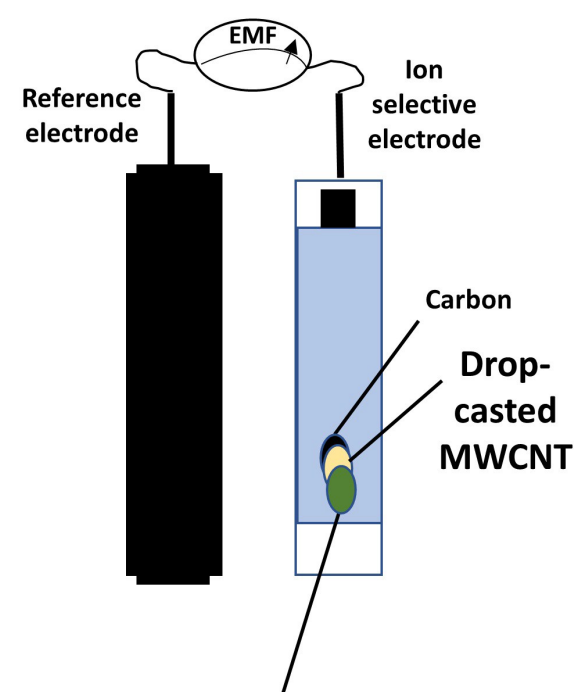

Drop of Ion selective  
membrane  
(PVC/O-NPOE/CX6)
